# Supplementary material
Source: PubMed Central journal article supplement (PMC6352555)
Supplement: Supp_Data.pdf [file Supp_Data.pdf]

## Supplementary Data

### Cell Transfection

siRNA *LOX* and their corresponding negative control, siControl (Life Technologies, Thermo Fisher Scientific, Rockford, IL), were transiently transfected into  $2 \times 10^5$  cells on six-well plates using the transfection reagent RNAiMAX (Invitrogen, Thermo Fisher Scientific) according to the manufacturer's protocol. THJ-16T and HEK-293 were used to generate inducible stable cell lines overexpressing *BRAF*<sup>V600E</sup> or *BRAF*<sup>E586K</sup>. The vectors were purchased from GeneCopoeia (GeneCopoeia, Rockville, MD).

### Invasion and Migration Assay

A cell migration assay using polycarbonate filters with a pore size of  $8 \mu\text{m}$  (BD Biosciences, Bedford, MA) was performed according to the manufacturer's protocol. Briefly, thyroid cell lines were incubated with doxycycline on six-well plates for 24 hours. Then, the cells were trypsinized and seeded in the upper chamber of the insert ( $2.5 \times 10^5$  cells) in serum-free medium with doxycycline. In the lower chamber, medium supplemented with 10% fetal bovine serum was added. Following incubation for

22 hours, the inserts were removed and stained according to the manufacturer's protocol.

### Protein Extraction and Western Blot Assay

Cells were lysed in a buffer containing 10 mM of Tris and 1% sodium dodecyl sulfate (SDS), protease inhibitor cocktail (Sigma-Aldrich, St. Louis, MO), and PhosphoSTOP phosphatase inhibitors (Roche, Indianapolis, IN). The lysates were quantified for protein concentrations using a Pierce BCA Protein Assay kit (Life Technologies). Cell lysates were analyzed in SDS-polyacrylamide gel and transferred onto polyvinylidene difluoride membranes (Bio-Rad Laboratories, Hercules, CA). The membranes were blocked with 5% bovine serum albumin in Tris-buffered saline-Tween buffer and then incubated with primary antibodies overnight at 4°C. The membranes were then incubated with the horseradish peroxidase-conjugated secondary antibodies. Protein bands were analyzed using Pierce enhanced chemiluminescence reagent (Thermo Fisher Scientific). The band densitometry was performed using the Image Lab software (Bio-Rad Laboratories).

SUPPLEMENTARY TABLE S1. COMPARISON OF CLINICAL AND PATHOLOGIC CHARACTERISTICS AND *LOX* AND *BRAF* STATUS IN TCGA DATA SET OF PATIENTS WITH THYROID CANCER

| Clinical characteristics | BRAF status            |                        | p      | BRAF-positive           |                          | p       |
|--------------------------|------------------------|------------------------|--------|-------------------------|--------------------------|---------|
|                          | BRAF-negative<br>% (n) | BRAF-positive<br>% (n) |        | <i>LOX</i> low<br>% (n) | <i>LOX</i> high<br>% (n) |         |
| Age, years               |                        |                        |        |                         |                          |         |
| ≥45                      | 53 (141)               | 56.6 (136)             | 0.4    | 56 (83)                 | 57.6 (53)                | 0.89    |
| <45                      | 47 (125)               | 43.3 (104)             |        | 43.9 (65)               | 42.4 (39)                |         |
| Sex                      |                        |                        |        |                         |                          |         |
| Female                   | 74 (197)               | 72 (173)               | 0.61   | 71.6 (106)              | 72.8 (67)                | 0.88    |
| Male                     | 26 (69)                | 28 (67)                |        | 28.4 (42)               | 27.2 (25)                |         |
| Overall stage            |                        |                        |        |                         |                          |         |
| Stage I–II               | 71 (188)               | 62.3 (149)             | 0.05   | 69.4(102)               | 51 (47)                  | 0.006   |
| Stage III–IV             | 29 (77)                | 37.6 (90)              |        | 30.6 (45)               | 49 (45)                  |         |
| Extrathyroidal extension |                        |                        |        |                         |                          |         |
| No                       | 76.3 (193)             | 61 (143)               | 0.0001 | 72.2 (104)              | 42.8 (39)                | <0.0001 |
| Yes                      | 33.6 (60)              | 39 (92)                |        | 27.8 (40)               | 57.1 (52)                |         |
| T stage                  |                        |                        |        |                         |                          |         |
| T1–T2                    | 55.3 (176)             | 45.6 (135)             | 0.03   | 68.7 (101)              | 36.9 (34)                | <0.0001 |
| T2–T3                    | 44.7 (89)              | 54.3 (104)             |        | 31.3 (46)               | 63 (58)                  |         |
| Lymph nodes              |                        |                        |        |                         |                          |         |
| No                       | 55.3 (131)             | 45.6 (100)             |        | 54 (73)                 | 32.1 (27)                |         |
| Yes                      | 44.7 (106)             | 54.3 (119)             | 0.05   | 46 (62)                 | 67.8 (57)                | 0.002   |
| Recurrence               |                        |                        |        |                         |                          |         |
| No                       | 92.7 (241)             | 87.9 (204)             |        | 91.7 (133)              | 81.6 (71)                |         |
| Yes                      | 7.3 (19)               | 12.1 (28)              | 0.09   | 8.3 (12)                | 18.4 (16)                | 0.035   |

SUPPLEMENTARY TABLE S2. CLINICAL CHARACTERISTICS  
OF THE COHORT FROM THE AUTHORS' INSTITUTION

| <i>Variables</i>                | <i>% (n)</i> |
|---------------------------------|--------------|
| Median age at diagnosis         |              |
| Male                            | 48 ± 13.23   |
| Female                          | 43.5 ± 13.69 |
| Sex                             |              |
| Male                            | 23.9 (26)    |
| Female                          | 76.1 (83)    |
| Stage                           |              |
| I–II                            | 63.3 (69)    |
| III–IV                          | 14.7 (16)    |
| N/A                             | 22 (24)      |
| Histological type               |              |
| cPTC                            | 71.5 (78)    |
| Other <sup>a</sup>              | 28.4 (31)    |
| Recurrence <sup>b</sup>         |              |
| Yes                             | 9.2 (10)     |
| No                              | 84.4 (92)    |
| N/A                             | 6.4 (7)      |
| Mortality                       |              |
| Alive                           | 100 (109)    |
| Dead                            | 0 (0)        |
| <i>BRAF</i> mutation status     |              |
| <i>BRAF</i> <sup>V600E</sup>    | 47.7 (52)    |
| No <i>BRAF</i> <sup>V600E</sup> | 52.3 (57)    |

<sup>a</sup>Tall-cell variant of papillary thyroid cancer ( $n=5$ ), follicular variant of papillary thyroid cancer ( $n=17$ ), and poorly differentiated thyroid cancer ( $n=1$ ).

<sup>b</sup>Patients with excellent response were assessed for recurrence by serum thyroglobulin and ultrasound for recurrent disease. Recurrence is defined as patients with structurally incomplete response. cPTC, classical papillary thyroid cancer.

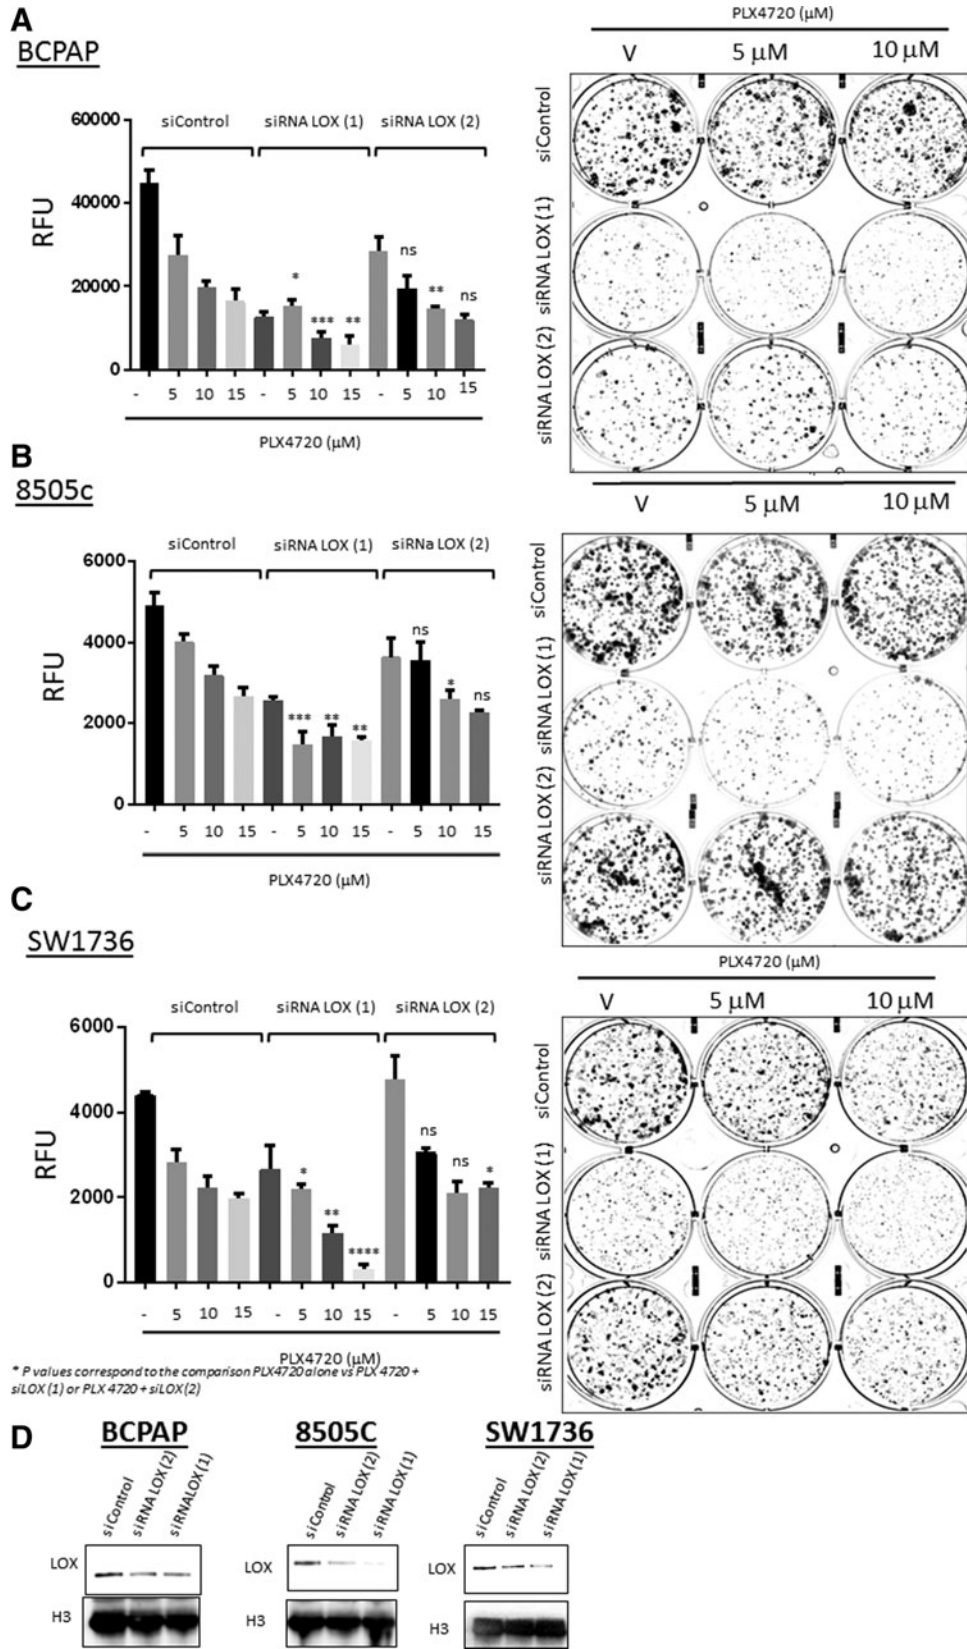

**SUPPLEMENTARY FIG. S1.** Knockdown of *LOX* sensitizes cancer cells to *BRAF*<sup>V600E</sup> inhibitor PLX4720. Analysis of cell proliferation and colony formation after treatment with different concentrations (0, 5, 10, and 15  $\mu$ M) of PLX4720 alone or in combination with siRNA LOX(1) or siRNA LOX(2) in (A) BCPAP, (B) 8505C, or (C) SW1736 cell lines. The *p*-values correspond to the comparison drug alone versus drug with siLOX(1) or siLOX(2). (D) Western blot analysis showing *LOX* knockdown efficiency in the three cancer cell lines 48 hours post transfection. \**p* < 0.05; \*\**p* < 0.01; \*\*\**p* < 0.001; \*\*\*\**p* < 0.0001. Error bars correspond to standard deviations.

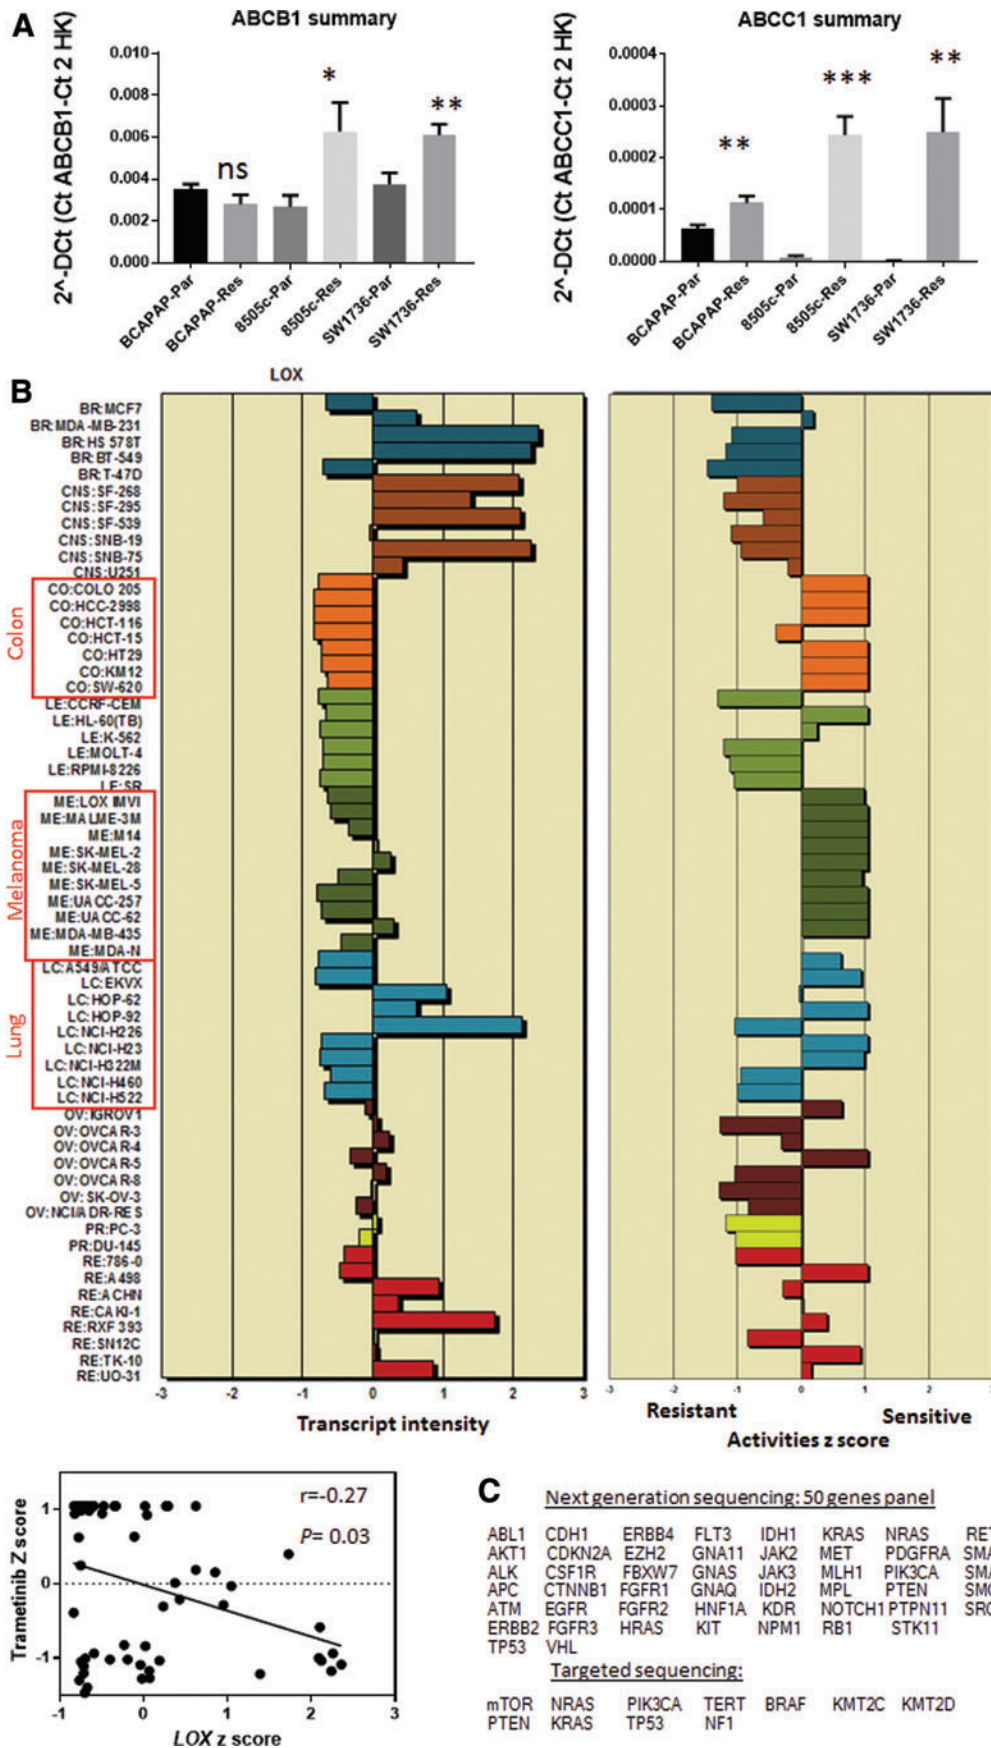

**SUPPLEMENTARY FIG. S2.** (A) PLX4720-resistant cells. RT-PCR validation of the expression of ABCB1 and ABCC1 in the parental and resistant cells. (B) A mean-centered graph representing *LOX* expression and sensitivity to MEK inhibitor Trametinib in the NCI-60 screening. The red squares highlight the human cancers with activation of the MAPK pathway. Spearman correlation and *p*-value between *LOX* expression (z-score transcript) and response to the drug (z-score activities). (C) The next-generation sequencing of a 50-gene panel and genes analyzed by targeted sequencing to evaluate the additional mutations. Error bars correspond to standard deviations. Ns, not significant. \**p* < 0.05; \*\**p* < 0.01; \*\*\**p* < 0.001.

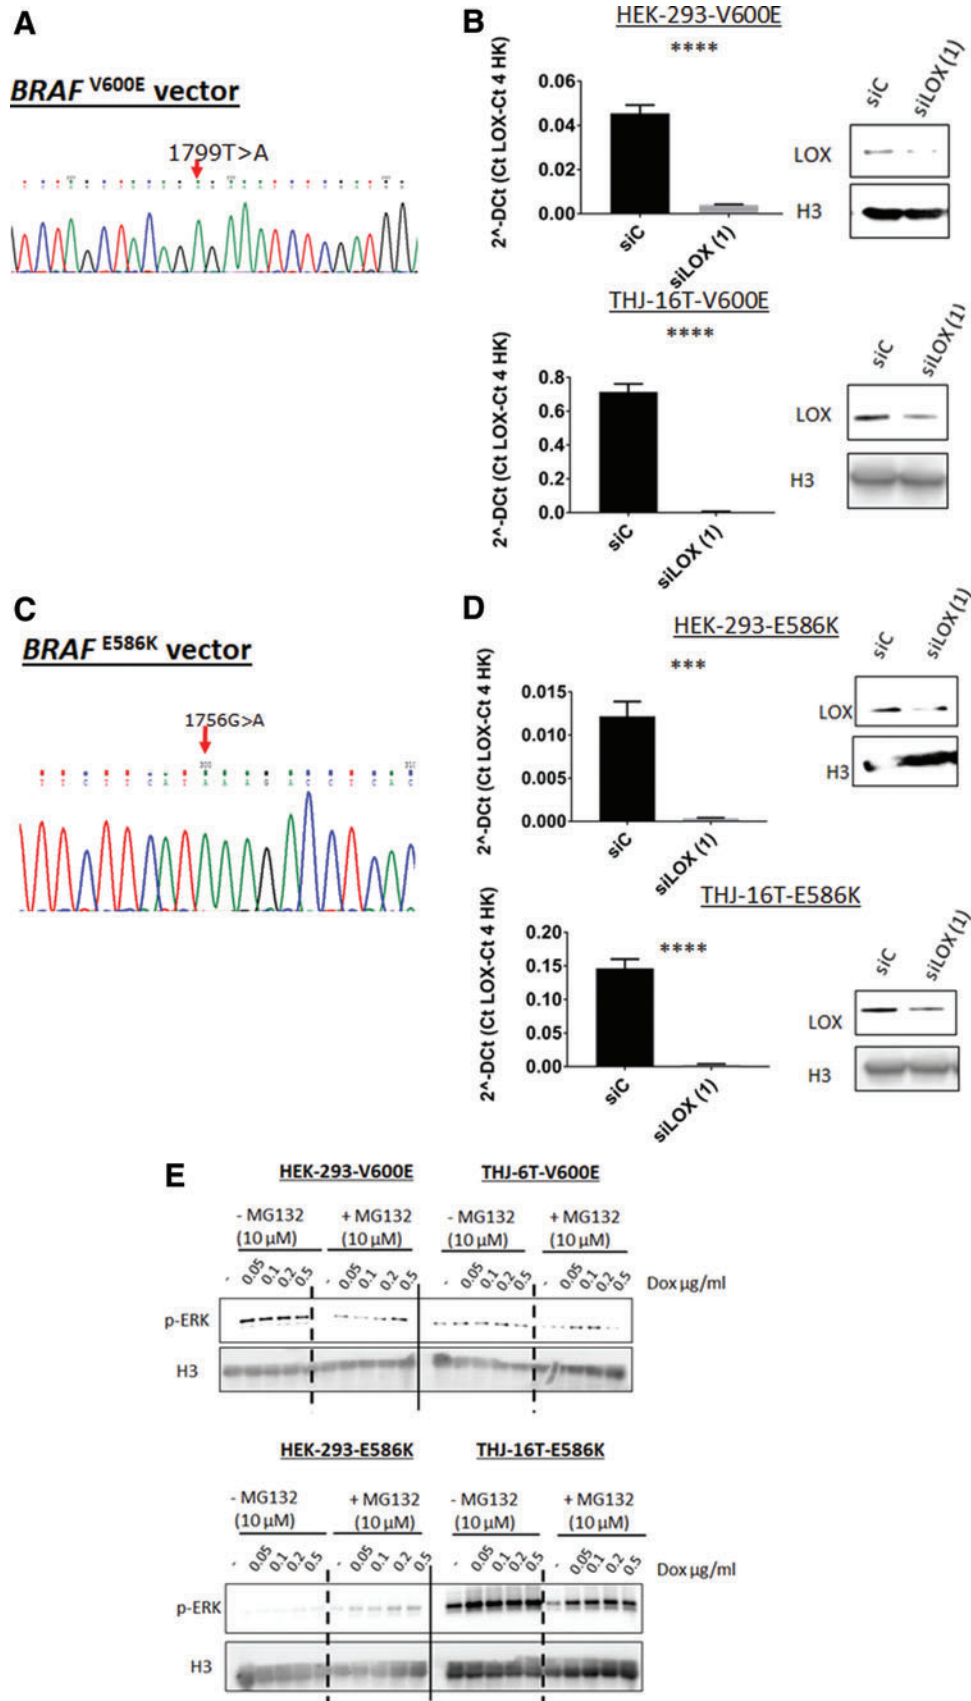

**SUPPLEMENTARY FIG. S3.** Induction of *BRAF*<sup>V600E</sup> or *BRAF*<sup>E586K</sup> (A) Sanger sequencing of the lentiviral vector with *BRAF*<sup>V600E</sup> mutation. (B) *LOX* knockdown efficiency by Western blot and RT-PCR in *BRAF*<sup>V600E</sup> cells. (C) Sanger sequencing of the lentiviral vector with *BRAF*<sup>E586K</sup> mutations. (D) *LOX* knockdown efficiency by Western blot and RT-PCR in *BRAF*<sup>E586K</sup> cells. Error bars correspond to standard deviations. (E) Western blot of p-ERK expression in the *BRAF*<sup>V600E</sup> and *BRAF*<sup>E586K</sup> cell lines induced with doxycycline, with and without MG-132. \*\*\**p* < 0.001; \*\*\*\**p* < 0.0001.

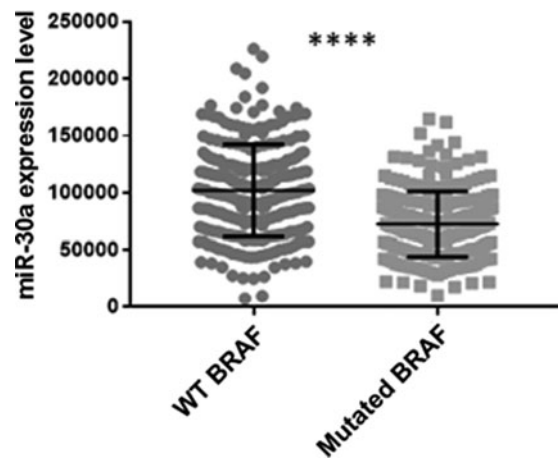

**SUPPLEMENTARY FIG. S4.** MiR-30a is downregulated in *BRAF*-mutated tumors. miR-30a is significantly downregulated in *BRAF*-mutated tumors in TCGA cohort of thyroid cancer patients. \*\*\*\* $p < 0.0001$ .
